# Supplementary material
Source: Elsevier journal article supplement (https://rcastoragev2.blob.core.windows.net/4099fa2bd44bd8cb0953e83794e62100/mmc10.pdf)
Supplement: mmc10 [file mmc10.pdf]

# **Pan-cancer analyses reveal cancer type-specific fungal ecologies and bacteriome interactions**

## **DATA S2**

Fungal imaging in human tumors, related to **Figure 2** and **STAR Methods**.

### **Table of Contents**

|                                                                                         |          |
|-----------------------------------------------------------------------------------------|----------|
| <b>Data S2.1. Validation of fungal staining methods on positive control slides.....</b> | <b>2</b> |
| <b>Data S2.2. Detection of canonical patterns of fungi in tumors .....</b>              | <b>3</b> |
| <b>Data S2.3. Visualization of fungi in human tumors.....</b>                           | <b>5</b> |
| <b>Data S2.4. Visualization of fungi in human tumors.....</b>                           | <b>6</b> |

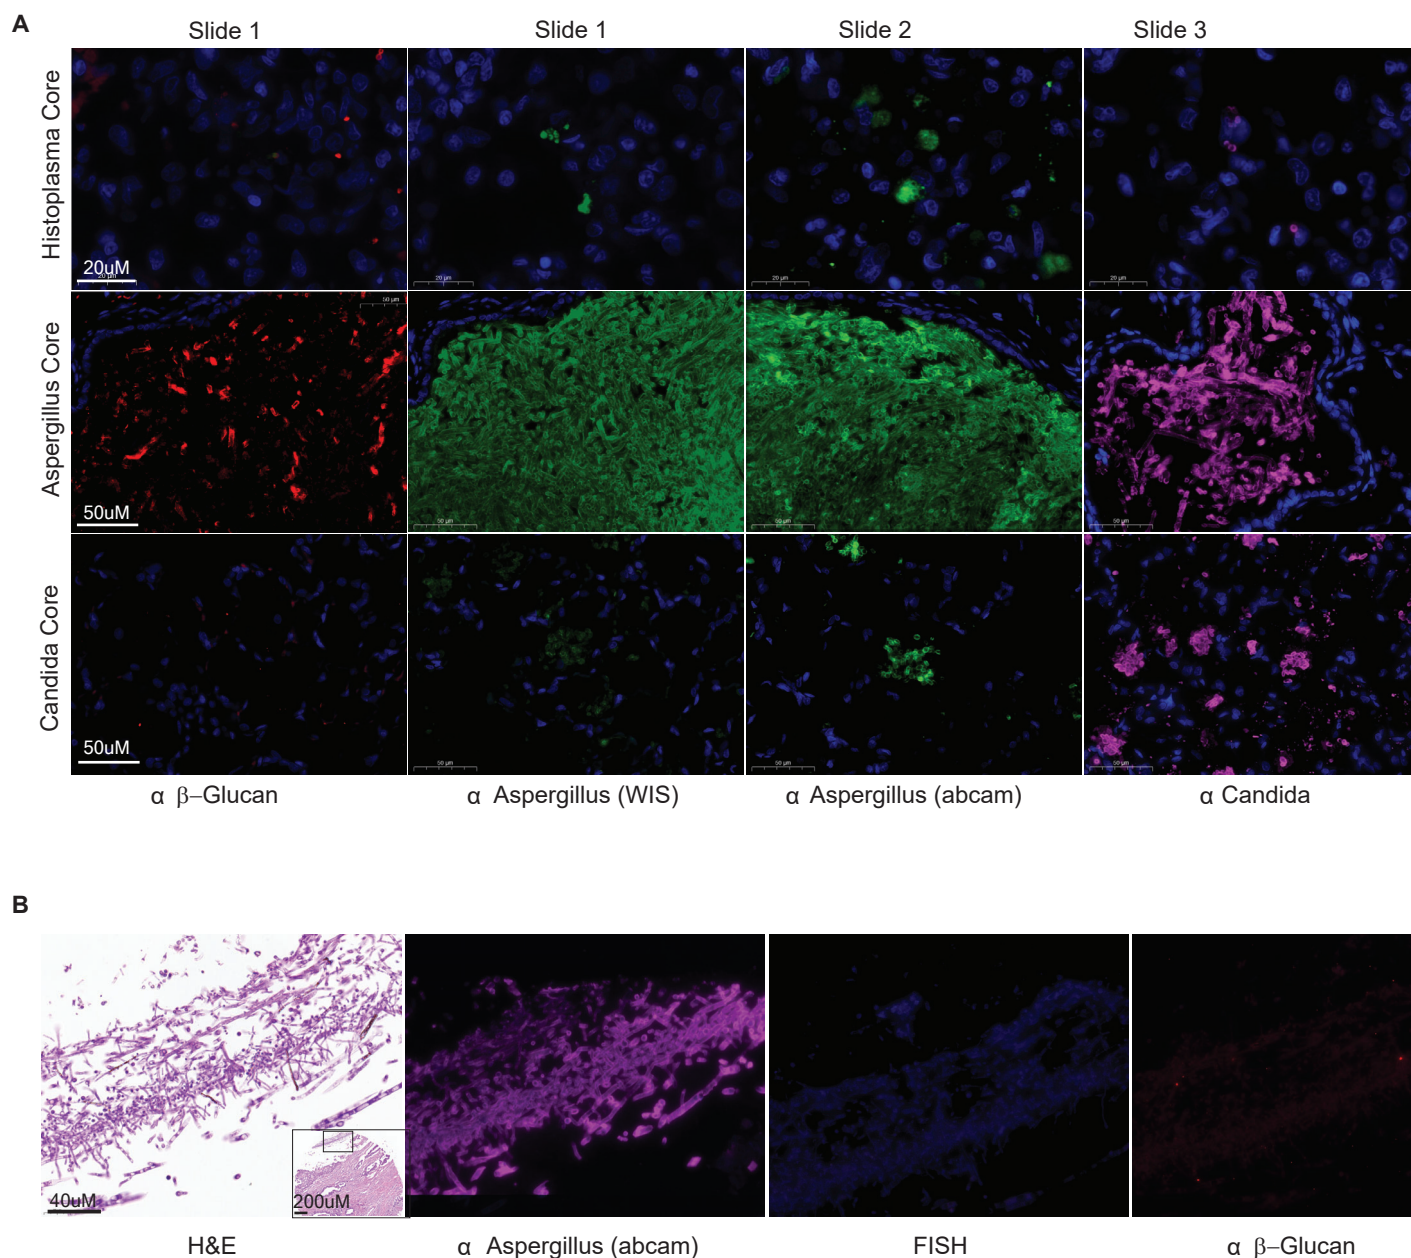

### Data S2.1. Validation of fungal staining methods on positive control slides

(A) FFPE slides from tissues infected with *Histoplasma* (upper panel), *Aspergillus* (middle panel) and *Candida* (lower panel), were stained with antibodies against  $\beta$ -glucan, *Aspergillus* (two antibodies), and *Candida*. Slide 1 was stained with antibodies against both  $\beta$ -glucan (red) and *Aspergillus* (green, abcam); slides 2 and 3 were stained with anti-*Aspergillus* and anti-*Candida*, respectively. Upper panel scale bar 20  $\mu$ m, middle and lower panels scale bar 50  $\mu$ m.

(B) Consecutive slides from a FFPE tumor block that was found to be contaminated with fungi in the paraffin (and not the tissue) were stained with hematoxylin and eosin (H&E), antibodies against *Aspergillus* (abcam) and  $\beta$ -glucan, or with fluorescence in situ hybridization (FISH) using probes against fungal 28S rRNA. The hyphae were only detected by the anti-*Aspergillus* antibody.



A

Ovarian Cancer

28S rRNA FISH

Control probes FISH

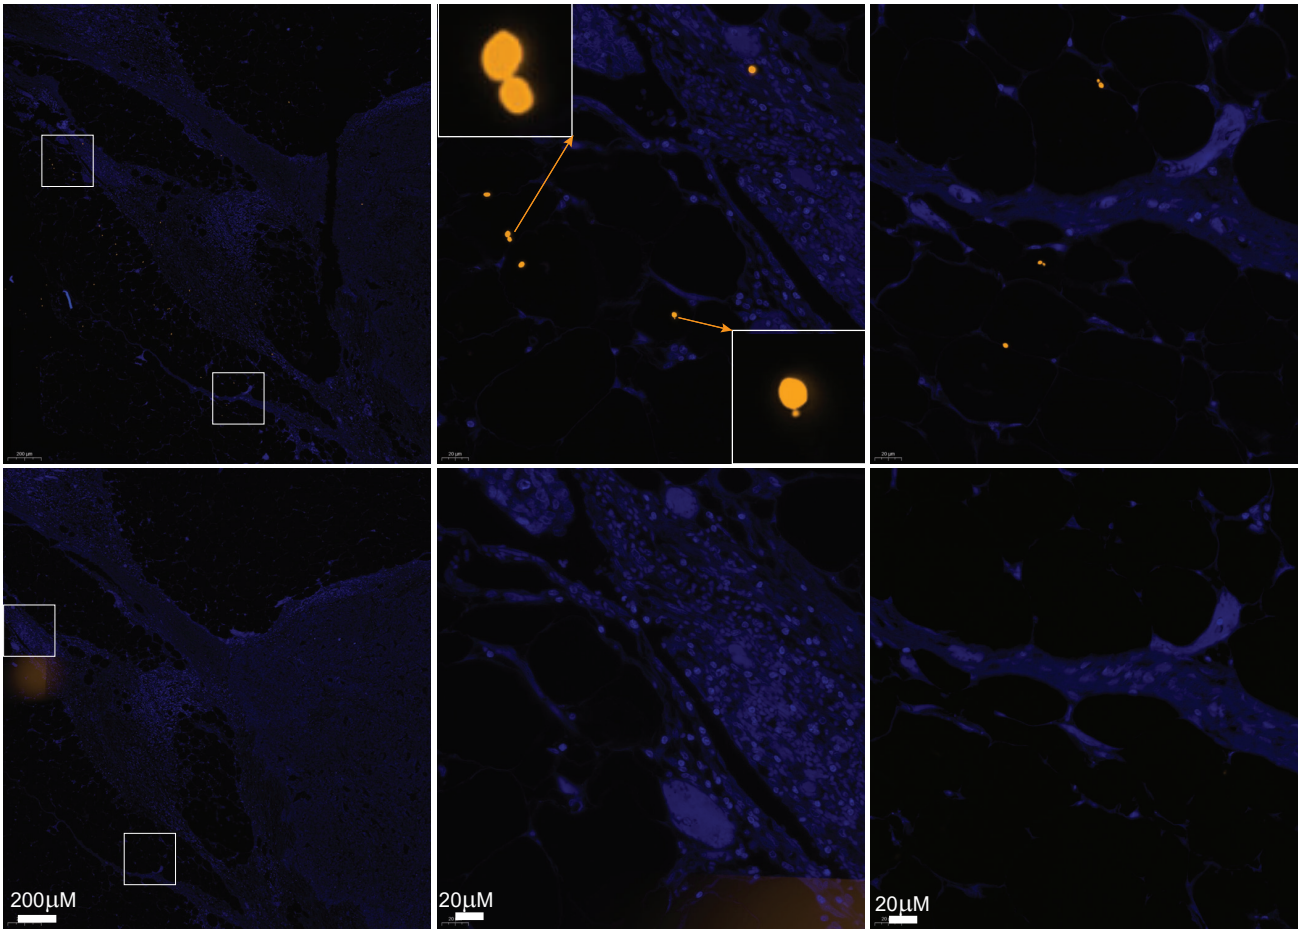

B

Lung cancer (NSCLC)

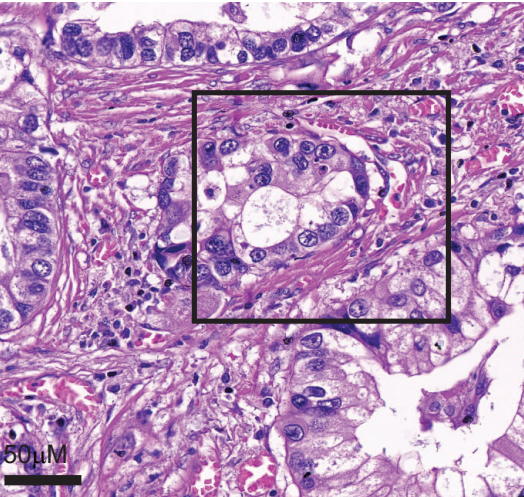

H&E

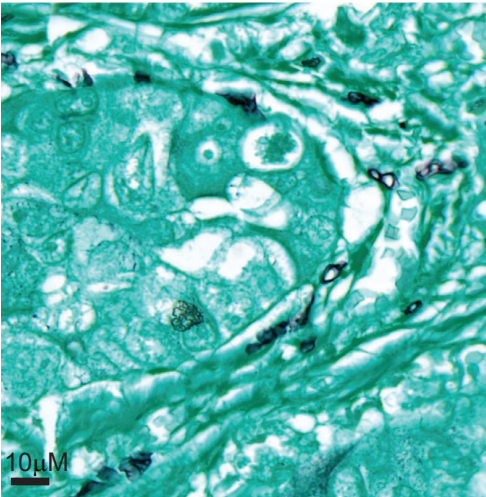

GMS

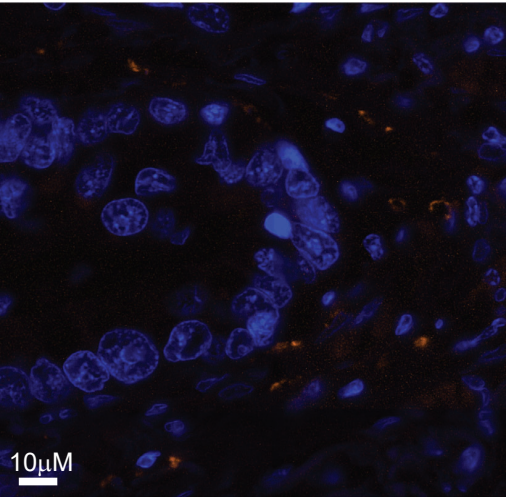

FISH

### **Data S2.2. Detection of canonical patterns of fungi in tumors**

**(A)** Fluorescence in situ hybridization (FISH) of a human ovarian tumor in FFPE block using 3 probes against fungal 28S rRNA (upper panel) or 3 scrambled control probes (lower panel) (see STAR Methods for probe details). ITS2 sequencing identified *Vishniacozyma victoriae* in this tissue sample. Scale bar in the first column is 200  $\mu\text{m}$ . Squares demarcates the areas presented at higher magnification in the next two columns in which the scale bar is 20  $\mu\text{m}$ .

**(B)** A human lung tumor in FFPE block was stained with hematoxylin and eosin (H&E), Gomori methenamine silver stain (GMS), or fluorescence in situ hybridization (FISH) using the same probes as in (A). ITS2 sequencing identified *Fusarium keratoplasticum* and *Aspergillus tardicrescens* in this tissue sample. Scale bar in the first column is 50  $\mu\text{m}$ . Square demarcates the area presented at higher magnification in next two columns in which scale bar is 10  $\mu\text{m}$ .



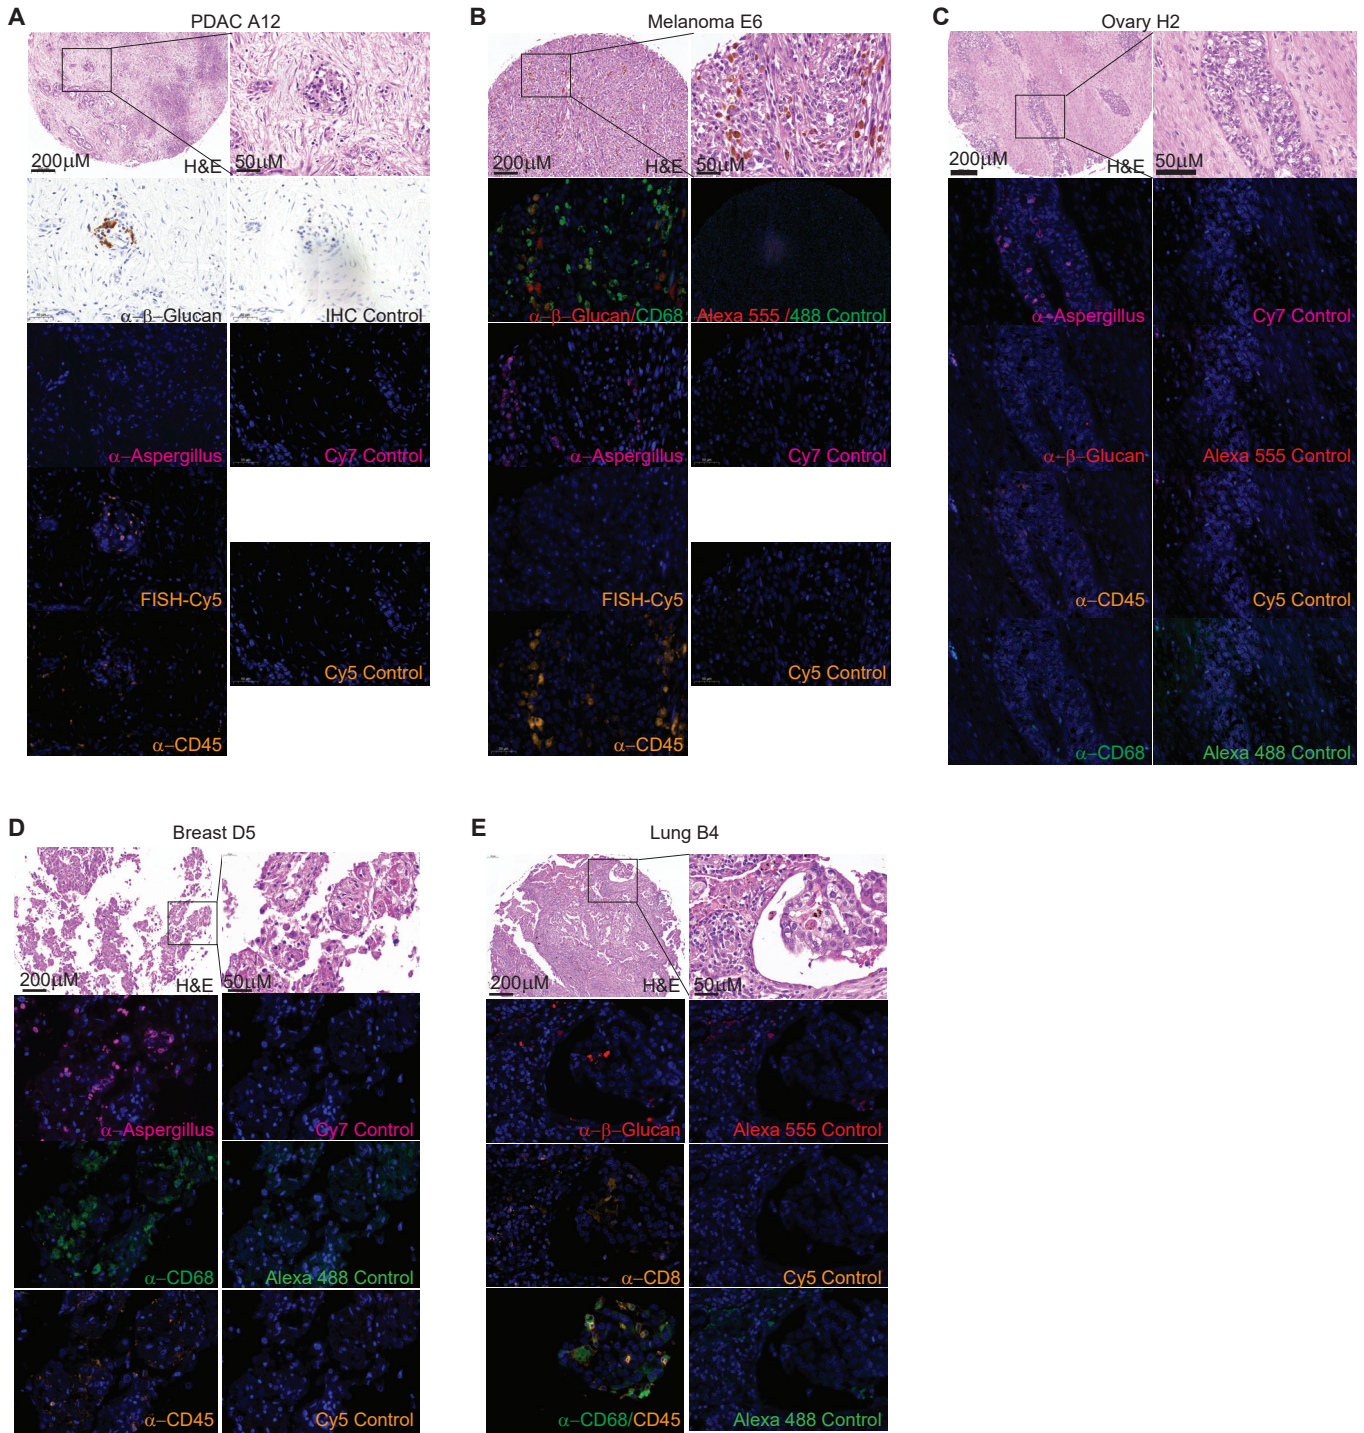

### Data S2.3. Visualization of fungi in human tumors

(A-E) Consecutive slides from a tumor microarray of (A) human pancreatic adenocarcinoma, (B) melanoma, (C) ovary, (D) breast, and (E) lung cancer, that appear in Figure 2. Slides were stained with hematoxylin and eosin (H&E), or antibodies against β-glucan, *Aspergillus* (*abcam*), CD45, CD68, CD8, or by fluorescence in situ hybridization (FISH) probes against fungal 28S rRNA. Slides were also stained with only secondary antibodies as a negative control, which appear here. (A-E) Scale bar for lower magnification of cores is located in the upper left corners of H&E staining panel: 200 µm. Scale bar for higher magnifications (all other panels) is 50 µm. Related to Figure 2.



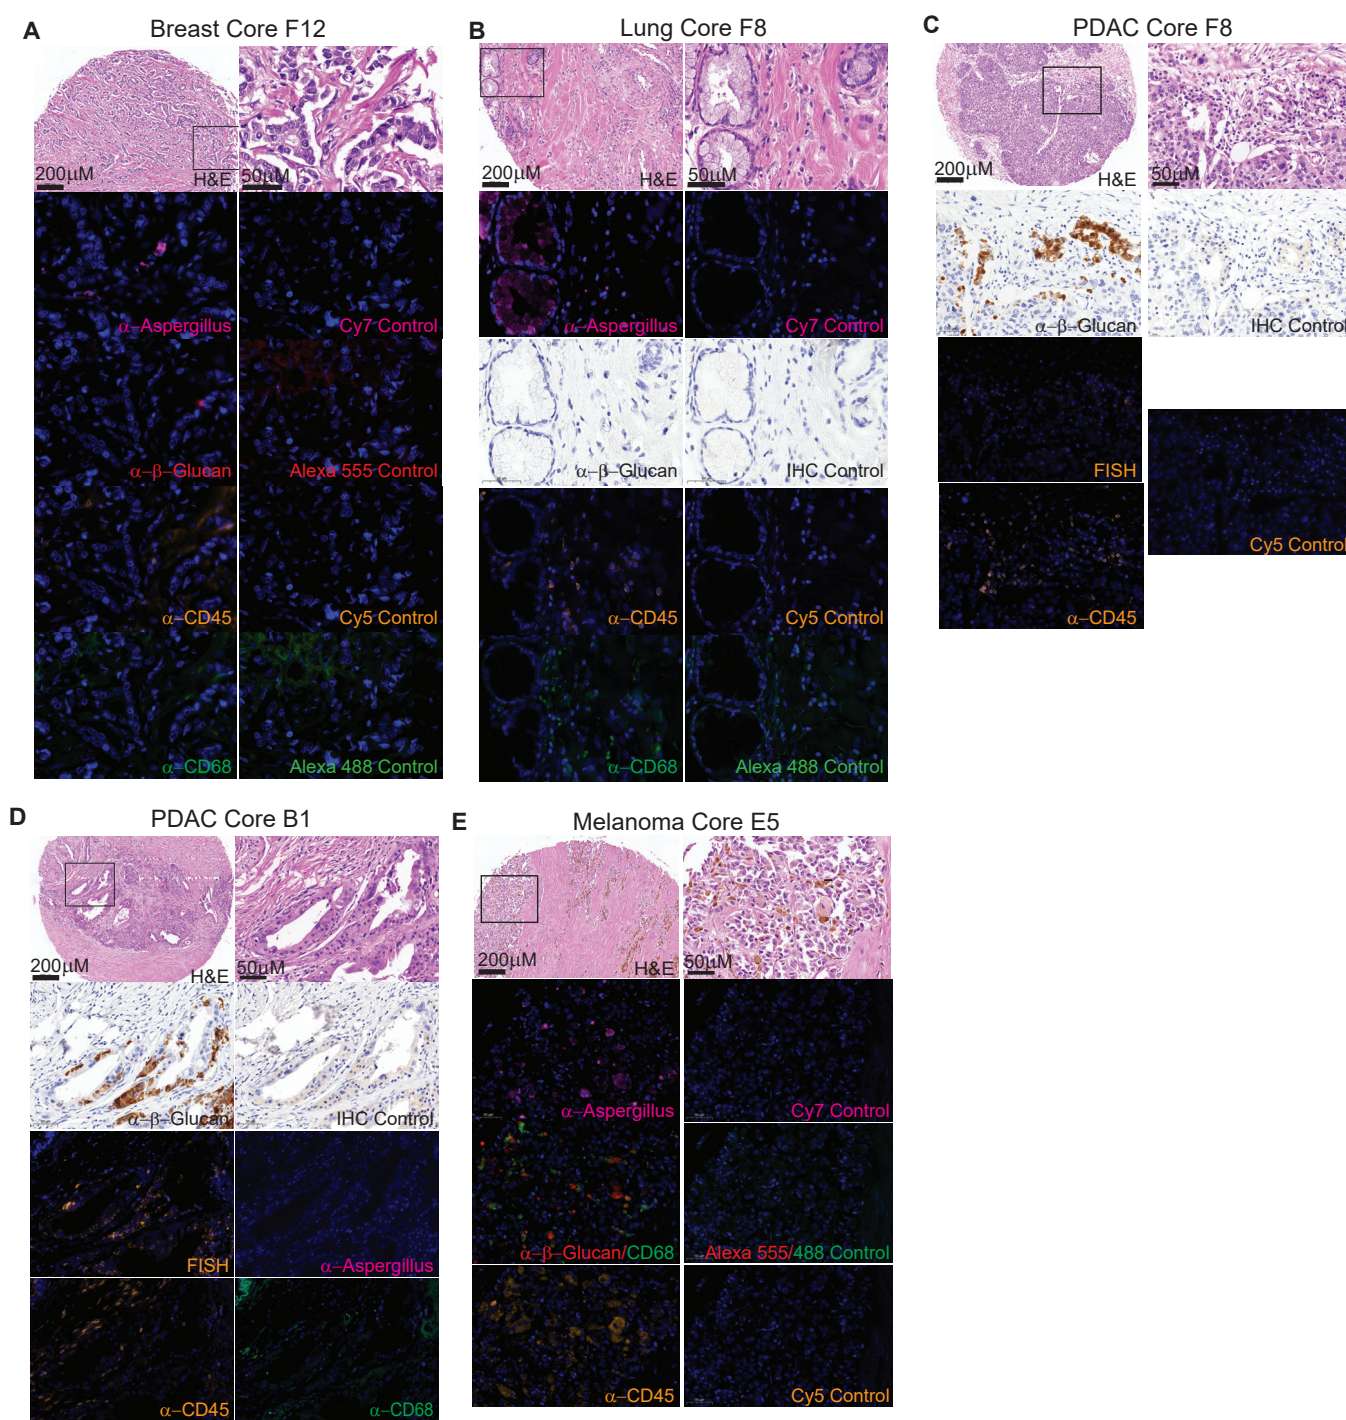

#### Data S2.4. Visualization of fungi in human tumors

(A-E) Consecutive slides from representative cores from tumor microarrays of (A) human breast cancer, (B) lung cancer, (C-D) pancreatic adenocarcinoma, and (E) melanoma, were stained with hematoxylin and eosin (H&E), antibodies against  $\beta$ -glucan, CD45, CD68, *Aspergillus* (abcam), CD8, or by fluorescence in situ hybridization (FISH) probes against fungal 28S rRNA. Slides were also stained with only secondary antibodies as a negative control. Note that in (D) the core used to evaluate fluorescence negative control is missing from this slide.

(A-E) Scale bar for low magnification: 200  $\mu$ m. Square demarcates the area presented at higher magnification. Scale bar for higher magnification (all other panels): 50  $\mu$ m.
